# Supplementary material for: Structure of Microbial Communities and Biological Activity in Tundra Soils of the Euro-Arctic Region (Rybachy Peninsula, Russia)
Source: MDPI journal article supplement (doi:10.3390/microorganisms11051352), 2023-05-22
Supplement: s1 [file s1]

Table S2. Scale for comparative assessment of enzymatic activity of soils [31]

| Enzymatic activity | Dehydrogenase,<br>mg TPF 10 g <sup>-1</sup> | B-glucosidase,<br>mg glucose g <sup>-1</sup> | Urease,<br>mg NH <sub>3</sub> g <sup>-1</sup> |
|--------------------|---------------------------------------------|----------------------------------------------|-----------------------------------------------|
| Very low           | <0.2                                        | <5                                           | <3                                            |
| Low                | 0.2-0.5                                     | 5-15                                         | 3-10                                          |
| Medium             | 0.5-1.0                                     | 15-50                                        | 10-30                                         |
| High               | 1.0-1.5                                     | 50-150                                       | 30-100                                        |
| Very high          | >1.5                                        | > 150                                        | > 100                                         |
