# Supplementary material for: Structure of Microbial Communities and Biological Activity in Tundra Soils of the Euro-Arctic Region (Rybachy Peninsula, Russia)
Source: MDPI journal article supplement (doi:10.3390/microorganisms11051352), 2023-05-22
Supplement: s1 [file s1]

**Table S1.** Structure of microbial biomass.

| Soil pit | Fungi           |                  |                                 |                       |                                 |                 |               |                 |                                |                              |                                                              | Prokaryotes                     |                 |                         |                |                                 |                                                          |                               |      | The proportion of fungi total microbial biomass, % |
|----------|-----------------|------------------|---------------------------------|-----------------------|---------------------------------|-----------------|---------------|-----------------|--------------------------------|------------------------------|--------------------------------------------------------------|---------------------------------|-----------------|-------------------------|----------------|---------------------------------|----------------------------------------------------------|-------------------------------|------|----------------------------------------------------|
|          | Mycelium        |                  |                                 | Spores (diameter, μm) |                                 |                 |               |                 | Total spore biomass, mg/g      | Total biomass of fungi, mg/g | The proportion of fungal mycelium in total fungal biomass, % | Actinomycete mycelium, m/g      |                 | Unicellular prokaryotes |                | Total prokaryotes biomass, mg/g | The proportion actinomycete mycelium in total biomass, % | Total microbial biomass, mg/g |      |                                                    |
|          |                 |                  |                                 | 2                     | 3                               | 5               | Biomass, mg/g | Length, m/g     |                                |                              |                                                              | Number, cells/g×10 <sup>8</sup> | Biomass, μg/g   |                         |                |                                 |                                                          |                               |      |                                                    |
|          | Biomass, mg/g   | Lenght, m/g      | Number, cells/g×10 <sup>5</sup> | Biomass, mg/g         | Number, cells/g×10 <sup>4</sup> | Biomass, mg/g   |               |                 | Number, cell/g×10 <sup>3</sup> | Biomass, mg/g                |                                                              |                                 |                 |                         |                |                                 |                                                          |                               |      |                                                    |
| RY01     | 0.294±<br>0.049 | 232.88±<br>41.50 | 1.59±<br>0.30                   | 0.053±<br>0.010       | 5.42±<br>0.97                   | 0.063±<br>0.012 | 2.42±<br>0.41 | 0.013±<br>0.002 | 0.129±<br>0.024                | 0.423±<br>0.081              | 68.1                                                         | 1.07±<br>0.20                   | 27.31±<br>5.12  | 9.13±<br>1.67           | 40.31±7<br>.26 | 41.38±<br>12.05                 | 2.6                                                      | 0.539±<br>0.032               | 78.5 |                                                    |
| RY02     | 0.159±<br>0.028 | 125.94±<br>22.09 | 1.44±<br>0.27                   | 0.048±<br>0.009       | 4.99±<br>0.95                   | 0.058±<br>0.011 | 3.16±<br>0.60 | 0.017±<br>0.003 | 0.123±<br>0.023                | 0.282±<br>0.054              | 56.4                                                         | 0.57±<br>0.11                   | 14.54±<br>2.65  | 6.12±<br>1.21           | 27.02±4<br>.86 | 27.59±<br>3.5                   | 2.0                                                      | 0.309±<br>0.005               | 91.3 |                                                    |
| RY08     | 0.018±<br>0.003 | 14.26±0<br>2.08  | 1.11±<br>0.24                   | 0.037±<br>0.007       | 9.83±<br>1.84                   | 0.066±<br>0.012 | –<br>–        | –<br>–          | 0.103±<br>0.020                | 0.121±<br>0.023              | 14.9                                                         | 0.20±<br>0.04                   | 5.17±<br>0.95   | 2.25±<br>0.41           | 9.93±1.<br>79  | 10.13±<br>2.5                   | 2.0                                                      | 0.131±<br>0.060               | 92.4 |                                                    |
| RY04     | 0.156±<br>0.027 | 123.57±<br>21.75 | 1.02±<br>0.20                   | 0.034±<br>0.006       | 6.11±<br>0.95                   | 0.041±<br>0.008 | –<br>–        | –<br>–          | 0.075±<br>0.014                | 0.231±<br>0.044              | 54.5                                                         | 0.41±<br>0.08                   | 10.45±<br>1.89  | 6.05±<br>1.10           | 26.71±4<br>.81 | 27.12±<br>3.8                   | 1.5                                                      | 0.258±<br>0.034               | 89.5 |                                                    |
| RY07     | 0.143±<br>0.025 | 113.27±<br>19.66 | 1.26±<br>0.20                   | 0.042±<br>0.008       | 10.73±<br>2.20                  | 0.072±<br>0.014 | –<br>–        | –<br>–          | 0.114±<br>0.021                | 0.257±<br>0.050              | 55.6                                                         | 0.29±<br>0.05                   | 7.39±<br>1.40   | 12.56±2.<br>49          | 55.45±9<br>.98 | 55.74±<br>10.2                  | 0.5                                                      | 0.313±<br>0.040               | 82.1 |                                                    |
| RY09     | 0.523±<br>0.098 | 413.67±<br>81.24 | 1.47±<br>0.28                   | 0.049±<br>0.009       | 8.20±<br>1.59                   | 0.055±<br>0.010 | 7.62±<br>1.49 | 0.041±<br>0.008 | 0.145±<br>0.027                | 0.669±<br>0.013              | 78.2                                                         | 0.19±<br>0.04                   | 5.07±<br>0.90   | 5.84±<br>1.12           | 25.78±4<br>.64 | 25.97±<br>4.3                   | 0.7                                                      | 0.695±<br>0.006               | 96.2 |                                                    |
| RY10     | 0.337±<br>0.064 | 267.27±<br>50.43 | 1.17±<br>0.24                   | 0.039±<br>0.007       | 7.06±<br>1.23                   | 0.051±<br>0.010 | –<br>–        | –<br>–          | 0.090±<br>0.017                | 0.427±<br>0.083              | 14.4                                                         | 2.49±<br>0.49                   | 66.32±<br>12.71 | 2.72±<br>0.52           | 12.01±2<br>.16 | 14.50±<br>3.8                   | 17.2                                                     | 0.442±<br>0.032               | 96.6 |                                                    |
| RY11     | 0.083±<br>0.015 | 65.67±0<br>12.57 | 0.96±<br>0.19                   | 0.032±<br>0.005       | 5.36±<br>1.00                   | 0.036±<br>0.007 | –<br>–        | –<br>–          | 0.068±<br>0.013                | 0.151±<br>0.028              | 55.0                                                         | 1.11±<br>0.22                   | 29.67±<br>5.14  | 2.13±<br>0.42           | 9.40±1.<br>69  | 10.51±<br>1.8                   | 10.6                                                     | 0.162±<br>0.005               | 93.2 |                                                    |
| R13      | 0.108±<br>0.020 | 85.40±0<br>16.02 | 1.35±<br>0.28                   | 0.045±<br>0.008       | 4.99±<br>0.95                   | 0.058±<br>0.011 | –<br>–        | –<br>–          | 0.103±<br>0.020                | 0.211±<br>0.040              | 51.1                                                         | 0.06±<br>0.011                  | 1.47±<br>0.20   | 3.27±<br>0.64           | 14.44±2<br>.60 | 14.50±<br>2.3                   | 0.4                                                      | 0.226±<br>0.045               | 93.4 |                                                    |

|      |        |         |       |        |       |        |        |        |        |        |      |       |        |       |         |        |     |        |      |
|------|--------|---------|-------|--------|-------|--------|--------|--------|--------|--------|------|-------|--------|-------|---------|--------|-----|--------|------|
| RY14 | 0.321± | 254.19± | 1.53± | 0.051± | 6.11± | 0.041± | 11.33± | 0.061± | 0.153± | 0.474± | 67.7 | 0.67± | 17.91± | 2.42± | 10.68±1 | 11.35± | 5.9 | 0.485± | 97.7 |
|      | 0.062  | 48.78   | 0.29  | 0.009  | 0.95  | 0.008  | 2.03   | 0.012  | 0.028  | 0.094  |      | 0.013 | 3.36   | 0.47  | .92     | 0.8    |     | 0.123  |      |

Note: “-” sign means “not found”
